# Supplementary material for: Vitamin D receptor and calcium-sensing receptor polymorphisms and colorectal cancer survival in the Newfoundland population
Source: PubMed Central journal article supplement — Br J Cancer. 2017 Aug 1;117(6):898–906. doi: 10.1038/bjc.2017.242 (PMC5589991; doi:10.1038/bjc.2017.242), 2017-08-01
Supplement: bjc2017242x1.pdf [file bjc2017242x1.pdf]

**Supplementary table 1. Association Between *VDR* SNPs and Colorectal Cancer Overall and Disease-Free Survival Assuming an Additive Mode of Inheritance**

| SNP ID                  | Position <sup>a</sup> | Major/Minor allele<br>(MAF) | All CRC                 |          |                                      | Colon cancer     |          |                                      | Rectum cancer           |          |                                      |
|-------------------------|-----------------------|-----------------------------|-------------------------|----------|--------------------------------------|------------------|----------|--------------------------------------|-------------------------|----------|--------------------------------------|
|                         |                       |                             | HR (95%CI) <sup>b</sup> | <i>P</i> | <i>P</i> <sub>ACT</sub> <sup>c</sup> | HR (95%CI)       | <i>P</i> | <i>P</i> <sub>ACT</sub> <sup>c</sup> | HR (95%CI) <sup>b</sup> | <i>P</i> | <i>P</i> <sub>ACT</sub> <sup>c</sup> |
| <b>Overall survival</b> |                       |                             |                         |          |                                      |                  |          |                                      |                         |          |                                      |
| rs11574143              | 48234917              | G/ <u>A</u> (0.089)         | 0.81 (0.52-1.25)        | 0.342    | 0.999                                | 1.14 (0.65-2.02) | 0.646    | 1.000                                | 0.34 (0.16-0.72)        | 0.005    | 0.147                                |
| rs731236                | 48238757              | T/ <u>C</u> (0.417)         | 1.48 (1.14-1.91)        | 0.003    | 0.083                                | 1.41 (1.03-1.91) | 0.031    | 0.568                                | 1.62 (0.99-2.65)        | 0.051    | 0.756                                |
| rs1544410               | 48239835              | G/ <u>A</u> (0.421)         | 1.50 (1.17-1.94)        | 0.002    | 0.058                                | 1.44 (1.06-1.96) | 0.020    | 0.426                                | 1.62 (0.99-2.65)        | 0.051    | 0.754                                |
| rs2239182               | 48255411              | G/ <u>A</u> (0.475)         | 0.85 (0.67-1.08)        | 0.182    | 0.985                                | 0.81 (0.64-1.09) | 0.157    | 0.974                                | 1.01 (0.66-1.55)        | 0.977    | 1.000                                |
| rs2107301               | 48255570              | <u>C</u> /T (0.230)         | 1.31 (0.99-1.73)        | 0.060    | 0.785                                | 1.35 (0.96-1.90) | 0.087    | 0.884                                | 1.24 (0.73-2.12)        | 0.431    | 1.000                                |
| rs2239179               | 48257766              | <u>A</u> /G (0.458)         | 0.77 (0.60-0.98)        | 0.033    | 0.605                                | 0.75 (0.55-1.02) | 0.062    | 0.791                                | 0.85 (0.55-1.33)        | 0.483    | 1.000                                |
| rs12721370              | 48262073              | G/ <u>T</u> (0.092)         | 0.80 (0.52-1.24)        | 0.322    | 0.999                                | 0.70 (0.41-1.19) | 0.186    | 0.985                                | 0.94 (0.43-2.08)        | 0.877    | 1.000                                |
| rs886441                | 48262964              | T/ <u>C</u> (0.199)         | 1.10 (0.82-1.47)        | 0.542    | 1.000                                | 0.99 (0.70-1.40) | 0.962    | 1.000                                | 1.52 (0.87-2.65)        | 0.139    | 0.968                                |
| rs2189480               | 48263828              | C/ <u>A</u> (0.373)         | 0.84 (0.65-1.08)        | 0.176    | 0.985                                | 0.88 (0.64-1.21) | 0.427    | 1.000                                | 0.73 (0.46-1.15)        | 0.178    | 0.978                                |
| rs2239186               | 48269410              | T/ <u>C</u> (0.203)         | 0.66 (0.50-0.88)        | 0.005    | 0.146                                | 0.67 (0.47-0.97) | 0.031    | 0.562                                | 0.70 (0.43-1.15)        | 0.160    | 0.972                                |
| rs6580642               | 48270596              | <u>C</u> /T (0.160)         | 0.84 (0.60-1.17)        | 0.291    | 0.998                                | 0.87 (0.58-1.32) | 0.524    | 1.000                                | 0.63 (0.34-1.15)        | 0.134    | 0.967                                |
| rs11168275              | 48272275              | <u>A</u> /G (0.242)         | 1.13 (0.85-1.50)        | 0.419    | 0.999                                | 1.07 (0.77-1.50) | 0.683    | 1.000                                | 1.15 (0.65-2.04)        | 0.634    | 1.000                                |
| rs10735810              | 48272895              | G/ <u>A</u> (0.393)         | 1.00 (0.78-1.28)        | 0.975    | 1.000                                | 0.86 (0.63-1.17) | 0.337    | 0.999                                | 1.31 (0.82-2.09)        | 0.265    | 0.993                                |
| rs2254210               | 48273714              | G/ <u>A</u> (0.399)         | 1.14 (0.90-1.44)        | 0.291    | 0.998                                | 1.04 (0.77-1.39) | 0.819    | 1.000                                | 1.36 (0.87-2.13)        | 0.172    | 0.977                                |
| rs2238136               | 48277713              | G/ <u>A</u> (0.243)         | 0.88 (0.66-1.18)        | 0.388    | 0.999                                | 0.96 (0.65-1.41) | 0.832    | 1.000                                | 0.75 (0.48-1.16)        | 0.196    | 0.983                                |
| rs2238135               | 48278190              | G/ <u>C</u> (0.221)         | 0.86 (0.65-1.14)        | 0.294    | 0.998                                | 0.91 (0.62-1.33) | 0.620    | 1.000                                | 0.77 (0.50-1.20)        | 0.251    | 0.993                                |
| rs2853564               | 48278487              | T/ <u>C</u> (0.421)         | 1.09 (0.86-1.40)        | 0.478    | 1.000                                | 1.01 (0.74-1.37) | 0.963    | 1.000                                | 1.31 (0.86-2.00)        | 0.215    | 0.986                                |
| rs4760648               | 48280665              | <u>C</u> /T (0.408)         | 1.04 (0.82-1.32)        | 0.755    | 1.000                                | 1.01 (0.74-1.38) | 0.969    | 1.000                                | 1.12 (0.75-1.68)        | 0.575    | 1.000                                |
| rs11168287              | 48285414              | <u>A</u> /G (0.498)         | 1.09 (0.85-1.39)        | 0.511    | 1.000                                | 0.89 (0.65-1.23) | 0.478    | 1.000                                | 1.09 (0.85-1.39)        | 0.511    | 1.000                                |
| rs4328262               | 48285648              | <u>T</u> /G (0.410)         | 1.00 (0.78-1.28)        | 0.991    | 1.000                                | 0.82 (0.59-1.13) | 0.228    | 0.990                                | 1.35 (0.90-2.01)        | 0.147    | 0.965                                |
| rs11168293              | 48293716              | G/ <u>T</u> (0.324)         | 1.04 (0.80-1.34)        | 0.781    | 1.000                                | 0.86 (0.62-1.19) | 0.361    | 0.998                                | 1.50 (0.95-2.36)        | 0.083    | 0.883                                |
| rs4760655               | 48294131              | <u>A</u> /G (0.351)         | 1.08 (0.84-1.40)        | 0.534    | 1.000                                | 0.91 (0.65-1.26) | 0.567    | 1.000                                | 1.44 (0.96-2.17)        | 0.076    | 0.863                                |

|                              |          |                     |                  |       |       |                  |       |       |                  |       |       |
|------------------------------|----------|---------------------|------------------|-------|-------|------------------|-------|-------|------------------|-------|-------|
| rs7136534                    | 48294626 | <u>C</u> /T (0.282) | 0.94 (0.72-1.24) | 0.668 | 1.000 | 1.00 (0.70-1.42) | 0.989 | 1.000 | 0.95 (0.61-1.49) | 0.837 | 1.000 |
| rs4516035                    | 48299826 | T/ <u>C</u> (0.431) | 1.06 (0.83-1.36) | 0.620 | 1.000 | 0.88 (0.65-1.21) | 0.440 | 1.000 | 1.65 (1.06-2.57) | 0.026 | 0.527 |
| <b>Disease-free survival</b> |          |                     |                  |       |       |                  |       |       |                  |       |       |
| rs11574143                   | 48234917 | G/ <u>A</u> (0.089) | 0.98 (0.66-1.45) | 0.913 | 1.000 | 1.05 (0.64-1.73) | 0.836 | 1.000 | 0.69 (0.34-1.39) | 0.296 | 0.998 |
| rs731236                     | 48238757 | T/ <u>C</u> (0.417) | 1.34 (1.07-1.69) | 0.012 | 0.313 | 1.24 (0.93-1.65) | 0.143 | 0.959 | 1.56 (1.02-2.38) | 0.041 | 0.668 |
| rs1544410                    | 48239835 | G/ <u>A</u> (0.421) | 1.37 (1.09-1.73) | 0.007 | 0.204 | 1.28 (0.96-1.70) | 0.091 | 0.909 | 1.56 (1.02-2.38) | 0.041 | 0.666 |
| rs2239182                    | 48255411 | G/ <u>A</u> (0.475) | 0.83 (0.67-1.04) | 0.100 | 0.923 | 0.79 (0.60-1.04) | 0.097 | 0.915 | 0.95 (0.65-1.40) | 0.809 | 1.000 |
| rs2107301                    | 48255570 | <u>C</u> /T (0.230) | 1.10 (0.84-1.43) | 0.496 | 1.000 | 1.22 (0.89-1.68) | 0.225 | 0.991 | 0.94 (0.58-1.54) | 0.805 | 1.000 |
| rs2239179                    | 48257766 | <u>A</u> /G (0.458) | 0.78 (0.62-0.98) | 0.031 | 0.581 | 0.74 (0.56-0.99) | 0.043 | 0.699 | 1.01 (0.67-1.53) | 0.957 | 1.000 |
| rs12721370                   | 48262073 | G/ <u>T</u> (0.092) | 0.87 (0.59-1.28) | 0.484 | 1.000 | 0.65 (0.41-1.04) | 0.072 | 0.861 | 1.40 (0.68-2.89) | 0.364 | 1.000 |
| rs886441                     | 48262964 | T/ <u>C</u> (0.199) | 1.02 (0.78-1.33) | 0.913 | 1.000 | 0.93 (0.67-1.29) | 0.647 | 1.000 | 1.36 (0.84-2.22) | 0.212 | 0.990 |
| rs2189480                    | 48263828 | C/ <u>A</u> (0.373) | 0.87 (0.69-1.10) | 0.238 | 0.996 | 0.96 (0.72-1.27) | 0.757 | 1.000 | 0.75 (0.49-1.13) | 0.168 | 0.980 |
| rs2239186                    | 48269410 | T/ <u>C</u> (0.203) | 0.73 (0.56-0.95) | 0.021 | 0.462 | 0.83 (0.59-1.16) | 0.275 | 0.997 | 0.55 (0.34-0.90) | 0.017 | 0.394 |
| rs6580642                    | 48270596 | <u>C</u> /T (0.160) | 1.03 (0.73-1.45) | 0.860 | 1.000 | 1.07 (0.69-1.67) | 0.772 | 1.000 | 0.85 (0.49-1.47) | 0.552 | 1.000 |
| rs11168275                   | 48272275 | <u>A</u> /G (0.242) | 1.04 (0.81-1.34) | 0.773 | 1.000 | 1.04 (0.77-1.42) | 0.787 | 1.000 | 0.95 (0.56-1.59) | 0.834 | 1.000 |
| rs10735810                   | 48272895 | G/ <u>A</u> (0.393) | 1.04 (0.83-1.31) | 0.721 | 1.000 | 0.87 (0.66-1.16) | 0.353 | 0.999 | 1.55 (1.03-2.35) | 0.038 | 0.651 |
| rs2254210                    | 48273714 | G/ <u>A</u> (0.399) | 1.07 (0.86-1.33) | 0.525 | 1.000 | 1.00 (0.77-1.30) | 0.994 | 1.000 | 1.22 (0.83-1.80) | 0.308 | 0.998 |
| rs2238136                    | 48277713 | G/ <u>A</u> (0.243) | 0.91 (0.70-1.18) | 0.479 | 1.000 | 0.99 (0.70-1.40) | 0.939 | 1.000 | 0.86 (0.57-1.30) | 0.474 | 1.000 |
| rs2238135                    | 48278190 | G/ <u>C</u> (0.221) | 0.90 (0.69-1.16) | 0.405 | 0.999 | 0.97 (0.69-1.38) | 0.876 | 1.000 | 0.85 (0.56-1.30) | 0.453 | 1.000 |
| rs2853564                    | 48278487 | T/ <u>C</u> (0.421) | 1.10 (0.88-1.37) | 0.426 | 0.999 | 1.03 (0.78-1.36) | 0.837 | 1.000 | 1.18 (0.80-1.73) | 0.405 | 1.000 |
| rs4760648                    | 48280665 | <u>C</u> /T (0.408) | 1.07 (0.86-1.33) | 0.568 | 1.000 | 1.05 (0.79-1.40) | 0.720 | 1.000 | 1.10 (0.77-1.57) | 0.615 | 1.000 |
| rs11168287                   | 48285414 | <u>A</u> /G (0.498) | 1.14 (0.91-1.43) | 0.265 | 0.997 | 0.91 (0.68-1.21) | 0.508 | 1.000 | 1.78 (1.18-2.67) | 0.006 | 0.167 |
| rs4328262                    | 48285648 | <u>T</u> /G (0.410) | 0.98 (0.78-1.24) | 0.881 | 1.000 | 0.79 (0.58-1.06) | 0.111 | 0.934 | 1.41 (0.95-2.08) | 0.084 | 0.874 |
| rs11168293                   | 48293716 | G/ <u>T</u> (0.324) | 1.07 (0.85-1.36) | 0.553 | 1.000 | 0.85 (0.63-1.15) | 0.297 | 0.997 | 1.51 (0.99-2.31) | 0.057 | 0.760 |
| rs4760655                    | 48294131 | <u>A</u> /G (0.351) | 1.07 (0.85-1.36) | 0.556 | 1.000 | 0.92 (0.68-1.23) | 0.560 | 1.000 | 1.36 (0.92-2.03) | 0.126 | 0.952 |
| rs7136534                    | 48294626 | <u>C</u> /T (0.282) | 1.01 (0.79-1.29) | 0.939 | 1.000 | 1.03 (0.74-1.42) | 0.881 | 1.000 | 0.98 (0.66-1.45) | 0.924 | 1.000 |

---

|           |          |                     |                  |       |       |                  |       |       |                  |       |       |
|-----------|----------|---------------------|------------------|-------|-------|------------------|-------|-------|------------------|-------|-------|
| rs4516035 | 48299826 | T/ <u>C</u> (0.431) | 1.10 (0.87-1.38) | 0.433 | 1.000 | 0.87 (0.65-1.17) | 0.364 | 0.999 | 1.58 (1.05-2.38) | 0.027 | 0.544 |
|-----------|----------|---------------------|------------------|-------|-------|------------------|-------|-------|------------------|-------|-------|

---

Abbreviations: CRC, colorectal cancer; HR, hazard ratio; MAF minor allele frequency.

<sup>a</sup> SNP locations were mapped according to the NCBI build 36 coordinates.

<sup>b</sup> Hazard ratio calculated in reference to the allele underlined. Cox proportional hazard model adjusted for sex, age at diagnosis, stage at diagnosis, race, reported screening procedure, marital status, MSI status, and BRAF mutation status where appropriate.

<sup>c</sup> *P*-values were adjusted for multiple comparisons using a modification of  $P_{ACT}$  for correlated tests developed by Conneely and Boehnke(Conneely & Boehnke, 2007).

**Supplementary table 2. Association Between *CASR* SNPs and Colorectal Cancer Overall and Disease-Free Survival Assuming an Additive Mode of Inheritance**

| SNP ID                       | Position <sup>a</sup> | Major/Minor allele<br>(MAF) | All CRC                 |          |                                      | Colon cancer            |          |                                      | Rectum cancer           |          |                                      |
|------------------------------|-----------------------|-----------------------------|-------------------------|----------|--------------------------------------|-------------------------|----------|--------------------------------------|-------------------------|----------|--------------------------------------|
|                              |                       |                             | HR (95%CI) <sup>b</sup> | <i>P</i> | <i>P</i> <sub>ACT</sub> <sup>c</sup> | HR (95%CI) <sup>b</sup> | <i>P</i> | <i>P</i> <sub>ACT</sub> <sup>c</sup> | HR (95%CI) <sup>b</sup> | <i>P</i> | <i>P</i> <sub>ACT</sub> <sup>c</sup> |
| <b>Overall survival</b>      |                       |                             |                         |          |                                      |                         |          |                                      |                         |          |                                      |
| rs34028592                   | 121902021             | <u>A</u> /G (0.185)         | 0.89 (0.66-1.20)        | 0.439    | 0.999                                | 0.97 (0.67-1.41)        | 0.859    | 1.000                                | 0.71 (0.40-1.23)        | 0.219    | 0.986                                |
| rs6762782                    | 121905657             | G/ <u>A</u> (0.387)         | 1.03 (0.80-1.32)        | 0.814    | 1.000                                | 0.83 (0.61-1.12)        | 0.220    | 0.990                                | 1.51 (0.98-2.34)        | 0.062    | 0.809                                |
| rs1814740                    | 121918491             | <u>A</u> /G (0.489)         | 1.18 (0.93-1.50)        | 0.168    | 0.983                                | 1.27 (0.93-1.72)        | 0.130    | 0.958                                | 1.05 (0.71-1.56)        | 0.797    | 1.000                                |
| rs35274320                   | 121937943             | G/ <u>A</u> (0.160)         | 1.29 (0.92-1.82)        | 0.146    | 0.972                                | 1.17 (0.77-1.78)        | 0.460    | 1.000                                | 1.67 (0.85-3.25)        | 0.135    | 0.966                                |
| rs1354162                    | 121954077             | <u>C</u> /A (0.091)         | 0.57 (0.33-0.98)        | 0.041    | 0.668                                | 0.38 (0.20-0.71)        | 0.003    | 0.081                                | 1.29 (0.59-2.83)        | 0.530    | 1.000                                |
| rs7637874                    | 121966952             | <u>C</u> /T (0.239)         | 0.87 (0.65-1.16)        | 0.342    | 0.999                                | 0.78 (0.54-1.13)        | 0.189    | 0.984                                | 1.07 (0.67-1.72)        | 0.766    | 1.000                                |
| rs34345120                   | 121968267             | <u>C</u> /T (0.055)         | 1.19 (0.74-1.91)        | 0.466    | 1.000                                | 1.37 (0.79-2.39)        | 0.262    | 0.995                                | 0.84 (0.33-2.11)        | 0.703    | 1.000                                |
| rs1463890                    | 121969937             | T/ <u>C</u> (0.140)         | 0.92 (0.66-1.27)        | 0.596    | 1.000                                | 0.79 (0.53-1.16)        | 0.220    | 0.989                                | 1.19 (0.63-2.22)        | 0.593    | 1.000                                |
| rs7647446                    | 121970020             | G/ <u>A</u> (0.185)         | 1.11 (0.82-1.49)        | 0.510    | 1.000                                | 1.05 (0.72-1.52)        | 0.807    | 1.000                                | 1.30 (0.75-2.23)        | 0.349    | 0.999                                |
| rs937625                     | 121971512             | <u>T</u> /G (0.085)         | 1.01 (0.66-1.56)        | 0.948    | 1.000                                | 1.20 (0.70-2.05)        | 0.508    | 1.000                                | 0.88 (0.42-1.87)        | 0.741    | 1.000                                |
| rs10222633                   | 121976926             | G/ <u>A</u> (0.492)         | 1.22 (0.96-1.56)        | 0.110    | 0.933                                | 1.41 (1.04-1.91)        | 0.028    | 0.540                                | 0.80 (0.50-1.28)        | 0.354    | 0.998                                |
| rs10934578                   | 121977282             | G/ <u>T</u> (0.334)         | 0.98 (0.77-1.26)        | 0.879    | 1.000                                | 0.80 (0.50-1.28)        | 0.354    | 0.999                                | 1.11 (0.72-1.73)        | 0.636    | 1.000                                |
| rs3804592                    | 121979229             | G/ <u>A</u> (0.133)         | 0.84 (0.56-1.26)        | 0.401    | 0.999                                | 0.80 (0.50-1.29)        | 0.358    | 0.999                                | 1.07 (0.49-2.36)        | 0.861    | 1.000                                |
| rs17250717                   | 121980186             | G/ <u>T</u> (0.095)         | 1.18 (0.74-1.90)        | 0.488    | 1.000                                | 1.64 (0.86-3.12)        | 0.133    | 0.958                                | 0.61 (0.29-1.30)        | 0.200    | 0.983                                |
| rs1801725                    | 122003757             | G/ <u>T</u> (0.140)         | 1.23 (0.86-1.75)        | 0.256    | 0.997                                | 1.12 (0.71-1.75)        | 0.635    | 1.000                                | 1.57 (0.86-2.89)        | 0.145    | 0.970                                |
| rs1042636                    | 122003769             | <u>A</u> /G (0.086)         | 1.46 (1.02-2.10)        | 0.039    | 0.660                                | 1.71 (1.10-2.68)        | 0.018    | 0.416                                | 1.14 (0.60-2.17)        | 0.682    | 1.000                                |
| rs1802757                    | 122005131             | <u>C</u> /T (0.145)         | 1.26 (0.90-1.76)        | 0.188    | 0.985                                | 1.17 (0.75-1.83)        | 0.485    | 1.000                                | 1.50 (0.87-2.60)        | 0.146    | 0.968                                |
| <b>Disease-free survival</b> |                       |                             |                         |          |                                      |                         |          |                                      |                         |          |                                      |
| rs34028592                   | 121902021             | <u>A</u> /G (0.185)         | 0.80 (0.59-1.09)        | 0.155    | 0.977                                | 0.96 (0.67-1.38)        | 0.821    | 1.000                                | 0.69 (0.42-1.14)        | 0.145    | 0.968                                |
| rs6762782                    | 121905657             | G/ <u>A</u> (0.387)         | 1.03 (0.82- 1.30)       | 0.792    | 1.000                                | 0.87 (0.65-1.17)        | 0.359    | 0.999                                | 1.32 (0.90-1.94)        | 0.152    | 0.973                                |
| rs1814740                    | 121918491             | <u>A</u> /G (0.489)         | 1.11 (0.90-1.39)        | 0.334    | 0.999                                | 1.19 (0.90-1.58)        | 0.221    | 0.992                                | 1.00 (0.70-1.41)        | 0.979    | 1.000                                |
| rs35274320                   | 121937943             | G/ <u>A</u> (0.160)         | 0.78 (0.46-1.33)        | 0.367    | 0.999                                | 0.77 (0.37-1.59)        | 0.483    | 1.000                                | 0.89 (0.39-2.05)        | 0.790    | 1.000                                |

|            |           |                     |                  |       |       |                  |       |       |                  |       |       |
|------------|-----------|---------------------|------------------|-------|-------|------------------|-------|-------|------------------|-------|-------|
| rs1354162  | 121954077 | <u>C</u> /A (0.091) | 0.75 (0.48-1.17) | 0.204 | 0.993 | 0.53 (0.28-0.97) | 0.041 | 0.691 | 1.30 (0.65-2.62) | 0.462 | 1.000 |
| rs7637874  | 121966952 | <u>C</u> /T (0.239) | 0.85 (0.66-1.11) | 0.229 | 0.995 | 0.77 (0.55-1.08) | 0.127 | 0.946 | 1.07 (0.71-1.60) | 0.763 | 1.000 |
| rs34345120 | 121968267 | <u>C</u> /T (0.055) | 1.32 (0.88-1.98) | 0.177 | 0.987 | 1.49 (0.92-2.41) | 0.108 | 0.933 | 1.04 (0.46-2.33) | 0.929 | 1.000 |
| rs1463890  | 121969937 | T/ <u>C</u> (0.140) | 0.80 (0.60-1.06) | 0.118 | 0.947 | 0.77 (0.54-1.10) | 0.146 | 0.958 | 0.83 (0.50-1.38) | 0.467 | 1.000 |
| rs7647446  | 121970020 | G/ <u>A</u> (0.185) | 1.16 (0.87-1.55) | 0.306 | 0.999 | 1.05 (0.73-1.51) | 0.785 | 1.000 | 1.36 (0.83-2.22) | 0.226 | 0.992 |
| rs937625   | 121971512 | <u>T</u> /G (0.085) | 1.18 (0.80-1.73) | 0.402 | 0.999 | 1.13 (0.68-1.88) | 0.645 | 1.000 | 1.37 (0.76-2.44) | 0.293 | 0.998 |
| rs10222633 | 121976926 | G/ <u>A</u> (0.492) | 0.72 (0.47-1.10) | 0.138 | 0.968 | 0.88 (0.51-1.51) | 0.640 | 1.000 | 0.46 (0.21-0.99) | 0.046 | 0.699 |
| rs10934578 | 121977282 | G/ <u>T</u> (0.334) | 1.70 (1.06-2.73) | 0.029 | 0.554 | 1.62 (0.88-2.99) | 0.121 | 0.946 | 1.66 (0.79-3.47) | 0.182 | 0.981 |
| rs3804592  | 121979229 | G/ <u>A</u> (0.133) | 0.86 (0.60-1.23) | 0.398 | 1.000 | 0.79 (0.52-1.21) | 0.276 | 0.996 | 1.09 (0.54-2.20) | 0.819 | 1.000 |
| rs17250717 | 121980186 | G/ <u>T</u> (0.095) | 1.24 (0.81-1.89) | 0.327 | 0.999 | 1.66 (0.92-2.98) | 0.092 | 0.910 | 0.75 (0.39-1.42) | 0.369 | 0.999 |
| rs1801725  | 122003757 | G/ <u>T</u> (0.140) | 1.08 (0.79-1.47) | 0.628 | 1.000 | 1.03 (0.69-1.53) | 0.897 | 1.000 | 1.25 (0.75-2.08) | 0.396 | 1.000 |
| rs1042636  | 122003769 | <u>A</u> /G (0.086) | 1.32 (0.95-1.83) | 0.095 | 0.918 | 1.39 (0.91-2.12) | 0.123 | 0.947 | 1.15 (0.67-1.96) | 0.618 | 1.000 |
| rs1802757  | 122005131 | <u>C</u> /T (0.145) | 1.19 (0.87-1.62) | 0.282 | 0.998 | 1.14 (0.75-1.72) | 0.535 | 1.000 | 1.41 (0.86-2.32) | 0.171 | 0.979 |

Abbreviations: CRC, colorectal cancer; HR, hazard ratio, MAF, minor allele frequency.

<sup>a</sup> SNP locations were mapped according to the NCBI build 36 coordinates.

<sup>b</sup> Hazard ratio calculated in reference to the allele underlined. Cox proportional hazard model adjusted for sex, age at diagnosis, stage at diagnosis, race, reported screening procedure, marital status, MSI status, and BRAF mutation status where appropriate.

<sup>c</sup> *P*-values were adjusted for multiple comparisons using a modification of  $P_{ACT}$  for correlated tests developed by Conneely and Boehnke (Conneely & Boehnke, 2007).

**Supplementary table 3. Association Between Selected Genetic Variations in *VDR* and *CASR* and Colorectal Cancer Overall Survival Stratified by Dietary Vitamin D and Calcium Intakes**

| Variant                      | Alleles <sup>a/</sup><br>Haplotypes | Dietary vitamin D HR (95% CI) <sup>b</sup> |                      | <i>P</i> <sub>int</sub> | Dietary calcium HR (95% CI) <sup>b</sup> |                      | <i>P</i> <sub>int</sub> <sup>d</sup> |
|------------------------------|-------------------------------------|--------------------------------------------|----------------------|-------------------------|------------------------------------------|----------------------|--------------------------------------|
|                              |                                     | <Median <sup>c</sup>                       | ≥Median <sup>c</sup> |                         | <Median <sup>c</sup>                     | ≥Median <sup>c</sup> |                                      |
| No. of deaths/At risk        |                                     | 63/214                                     | 71/217               |                         | 65/218                                   | 69/213               |                                      |
| <b><i>VDR</i></b>            |                                     |                                            |                      |                         |                                          |                      |                                      |
| rs731236 ( <i>TaqI</i> )     | T/C                                 | 1.40 (0.95-2.05)                           | 1.38 (0.96-1.98)     | 0.976                   | 1.03 (0.99-1.06)                         | 1.30 (0.92-1.82)     | 0.386                                |
| rs1544410 ( <i>BsmI</i> )    | G/A                                 | 1.46 (0.99-2.13)                           | 1.38 (0.96-1.98)     | 0.880                   | 1.63 (1.10-2.40)                         | 1.31 (0.93-1.84)     | 0.336                                |
| rs10735810 ( <i>FokI</i> )   | G/A                                 | 1.43 (0.95-2.13)                           | 0.82 (0.59-1.14)     | 0.052                   | 1.35 (0.91-2.01)                         | 0.78 (0.56-1.10)     | 0.047                                |
| Linkage block 1 <sup>e</sup> | GTG                                 | 1.49 (1.03-2.16)                           | 1.21 (0.85-1.73)     | 0.138                   | 1.57 (1.09-2.26)                         | 1.18 (0.84-1.68)     | 0.123                                |
|                              | GCA                                 | 0.72 (0.49-1.05)                           | 0.73 (0.50-1.05)     | 0.406                   | 0.64 (0.43-0.94)                         | 0.77 (0.55-1.09)     | 0.290                                |
|                              | ATG                                 | 0.86 (0.42-1.77)                           | 1.43 (0.80-2.55)     | 0.300                   | 0.97 (0.49-1.92)                         | 1.45 (0.80-2.61)     | 0.280                                |
| Linkage block 2 <sup>f</sup> | CTC                                 | 0.76 (0.52-1.11)                           | 1.04 (0.74-1.48)     | 0.207                   | 0.85 (0.59-1.23)                         | 1.00 (0.70-1.41)     | 0.749                                |
|                              | ACC                                 | 1.59 (1.00-2.51)                           | 1.30 (0.86-1.95)     | 0.342                   | 1.69 (1.06-2.70)                         | 1.10 (0.71-1.73)     | 0.313                                |
|                              | ATC                                 | 1.04 (0.62-1.72)                           | 0.87 (0.56-1.36)     | 0.925                   | 0.83 (0.50-1.39)                         | 0.94 (0.60-1.46)     | 0.636                                |
|                              | CTT                                 | 0.85 (0.53-1.39)                           | 0.74 (0.45-1.20)     | 0.438                   | 0.84 (0.53-1.35)                         | 0.89 (0.55-1.45)     | 0.864                                |
| <b><i>CASR</i></b>           |                                     |                                            |                      |                         |                                          |                      |                                      |
| rs1801725 (A986S)            | G/T                                 | 1.36 (0.81-2.30)                           | 1.30 (0.79-2.14)     | 0.995                   | 1.13 (0.70-1.85)                         | 1.41 (0.84-2.39)     | 0.619                                |
| rs1042636 (R990G)            | A/G                                 | 1.93 (1.16-3.22)                           | 1.20 (0.71-2.03)     | 0.216                   | 2.21 (1.37-3.56)                         | 1.01 (0.57-1.81)     | 0.040                                |
| Linkage block 2 <sup>g</sup> | GGCC                                | 1.65 (1.15-2.38)                           | 1.27 (0.88-1.82)     | 0.104                   | 1.37 (0.95-1.98)                         | 1.46 (1.02-2.10)     | 0.705                                |
|                              | AGCT                                | 0.76 (0.48-1.22)                           | 0.90 (0.62-1.31)     | 0.099                   | 0.78 (0.50-1.21)                         | 0.88 (0.59-1.33)     | 0.371                                |
|                              | AGCC                                | 1.06 (0.68-1.64)                           | 1.15 (0.76-1.77)     | 0.809                   | 1.06 (0.70-1.61)                         | 1.24 (0.80-1.94)     | 0.957                                |
|                              | GACC                                | 0.70 (0.40-1.22)                           | 0.84 (0.54-1.33)     | 0.905                   | 0.87 (0.51-1.49)                         | 0.71 (0.44-1.13)     | 0.370                                |
|                              | AGAC                                | 0.55 (0.25-1.22)                           | 0.58 (0.27-1.25)     | 0.670                   | 0.67 (0.30-1.48)                         | 0.51 (0.24-1.09)     | 0.801                                |
| Linkage block 4 <sup>h</sup> | AGGGGAC                             | 0.63 (0.41-0.96)                           | 0.82 (0.56-1.21)     | 0.456                   | 0.73 (0.49-1.09)                         | 0.73 (0.49-1.10)     | 0.753                                |
|                              | AGGGGAT                             | 1.44 (0.89-2.34)                           | 1.11 (0.67-1.85)     | 0.465                   | 1.02 (0.61-1.71)                         | 1.44 (0.89-2.33)     | 0.892                                |

|         |                  |                  |       |                  |                  |       |
|---------|------------------|------------------|-------|------------------|------------------|-------|
| GTGGTAC | 0.74 (0.43-1.26) | 0.77 (0.46-1.27) | 0.628 | 0.88 (0.54-1.45) | 0.70 (0.41-1.20) | 0.895 |
| GGAGGAC | 1.72 (0.96-3.10) | 0.83 (0.46-1.48) | 0.131 | 1.31 (0.70-2.47) | 0.97 (0.55-1.71) | 0.793 |
| GTGTGAC | 0.62 (0.28-1.34) | 1.11 (0.59-2.07) | 0.100 | 0.51 (0.23-1.11) | 1.20 (0.64-2.25) | 0.208 |
| GTGGGGC | 1.96 (1.16-3.29) | 1.20 (0.71-2.05) | 0.058 | 2.21 (1.36-3.58) | 1.04 (0.58-1.87) | 0.017 |
| GGGGGAC | 1.18 (0.45-3.01) | 2.58 (1.36-4.84) | 0.163 | 1.22 (0.51-2.90) | 2.79 (1.46-5.31) | 0.181 |

<sup>a</sup> Two variants at the locus presented as: major allele/minor allele. Hazard ratio calculated in reference to the allele underlined.

<sup>b</sup> Cox proportional hazard model adjusted for age at diagnosis, sex, race, stage at diagnosis, reported screening procedure, marital status, and MSI status where appropriate.

<sup>c</sup> Median dietary intakes are 5.6 µg/d for vitamin D and 862.1 mg/d for calcium.

<sup>d</sup> *P* for interaction is computed with Wald method testing significance of multiplicative interaction term between genetic variants and respective stratified variable; not adjusted for multiple comparisons.

<sup>e</sup> *VDR*, linkage block 1 includes rs11574143, rs731236, and rs1544410.

<sup>f</sup> *VDR*, linkage block 2 includes rs2189480, rs2239186, and rs6580642.

<sup>g</sup> *CASR*, linkage block 2 includes rs1814740, rs35274320, rs1354162, and rs7637874.

<sup>h</sup> *CASR*, linkage block 4 includes rs10222633, rs10934578, rs3804592, rs17250717, rs1801725, rs1042636, and rs1802757.

A.

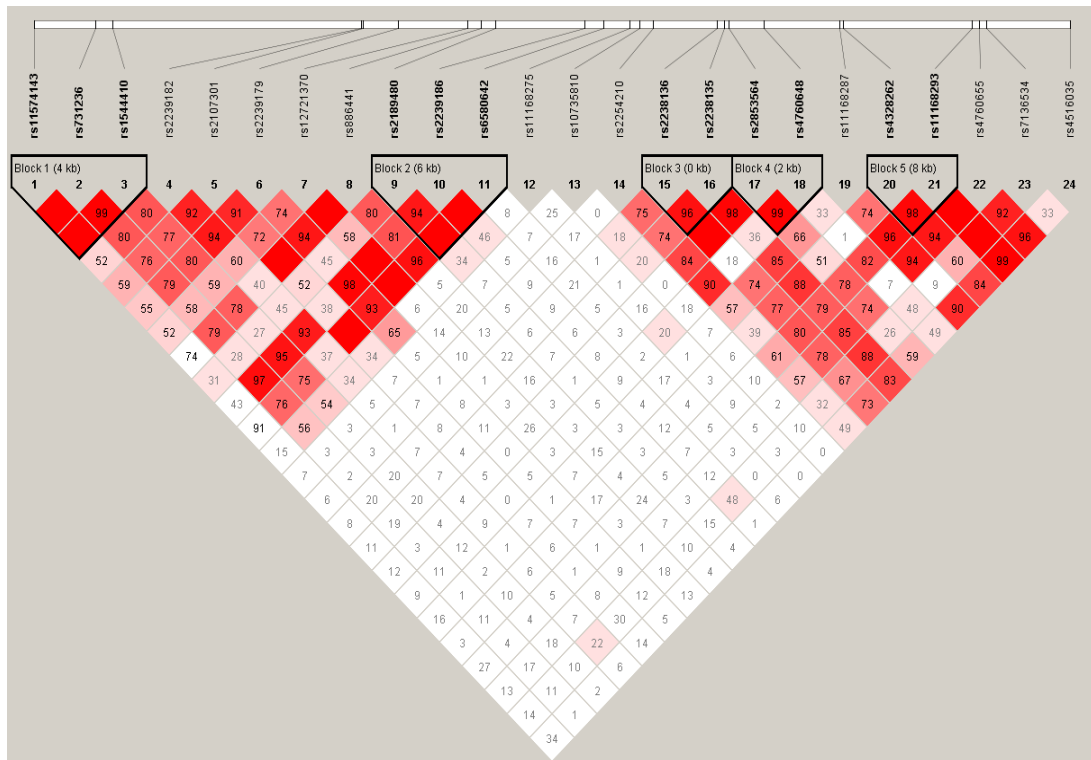

B.

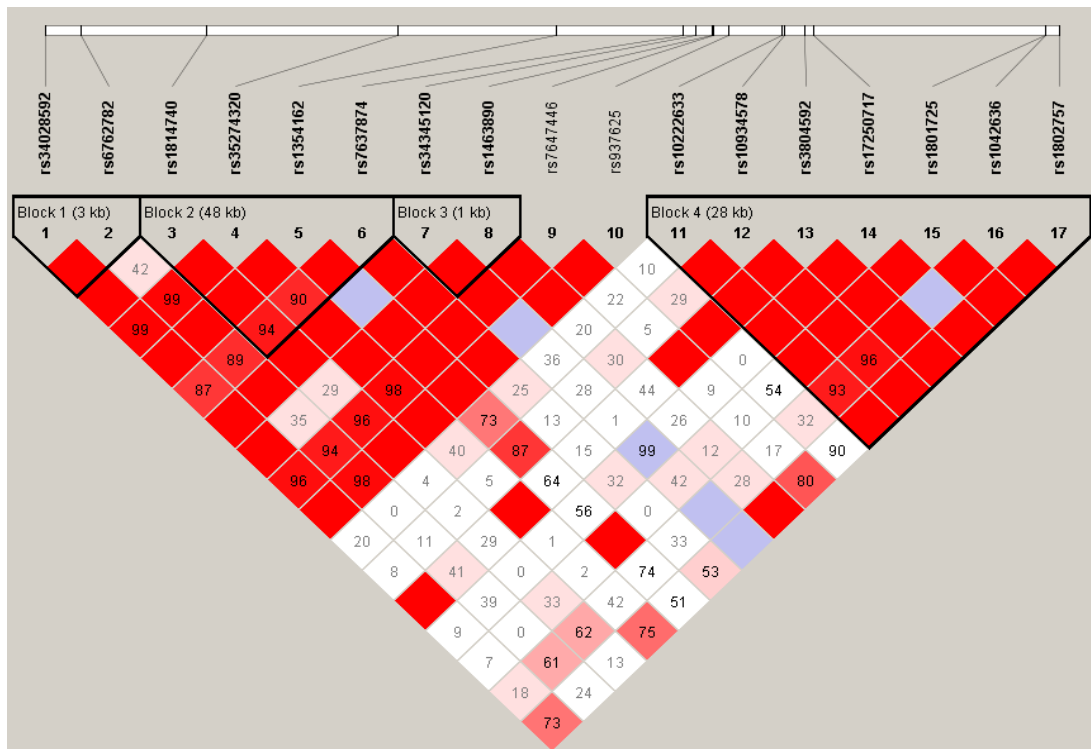

**Supplementary figure 1. The linkage disequilibrium (LD) plot of A. *VDR* and B. *CASR* genes.** LD strength between the SNPs was indicated by the standard Haploview color scheme based on both  $D'$  and LOD values ( $D' < 1$  and  $\text{LOD} < 2$  in white;  $D' = 1$  and  $\text{LOD} < 2$  in blue;  $D' < 1$  and  $\text{LOD} \geq 2$  in shades of pink/red;  $D' = 1$  and  $\text{LOD} \geq 2$  in bright red). Numbers in squares are  $D'$  ( $\times 100$ ), but those with  $D' = 1$  are not shown. The black triangle marks the single haplotype block within each gene.
